# Supplementary material for: Accountability in healthcare in the Netherlands: A scoping review
Source: Research Square preprint supplement (doi:10.21203/rs.3.rs-1359013/v1), 2022-03-08
Supplement: Supplementary file 1 [file d220cd5c93b3f55b4fc58c3c.docx]

**Appendix 1 Search Strategy by database**

| **What is the state of play of knowledge and practice of accountability in healthcare in The Netherlands?** | **Wiley Online Library** | **PubMed** | **Academic Search Complete** | **Business Source Premier** | **CINAHL** | **Academic Workplace Supervision** |
| --- | --- | --- | --- | --- | --- | --- |
| **Search process**  **Search string** | Date of search and # hits | Date of search and # hits | Date of search and # hits | Date of search and # hits | Date of search and # hits | Date of search  and # hits |
| Healthcare OR "health care" AND "Social responsibility" OR Accountability OR "good governance" OR governance OR accountable OR reasonableness OR transparency OR "public accountability" OR "relational accountability" OR "performance indicators" OR "quality indicators" OR "performance measurement" OR "performance management" OR governability OR legitimacy OR "Performance assessment" OR responsibility OR "high reliability organization" OR answerability OR reform OR "Accountable organizations" OR "professional accountability" OR "market accountability" OR "regulatory accountability" OR "performance assessment" OR "healthcare inspectorate" OR "financial accountability" OR "Healthcare insurance" AND Dutch OR Netherlands OR holland | 31-3-2021  94 hits | 31-3-2021  79 hits | 31-3-2021  135 hits | 31-3-2021  34 hits | 31-3-2021  132 hits | 31-3-2021  31 hits |
